# Supplementary material
Source: publisher figshare collection journal article supplement (https://acs.figshare.com/ndownloader/files/3982576)
Supplement: Supplementary file 1 [file 3982576]

data_global
_audit_creation_method                  'APEX2 v2011.2-0'

_publ_requested_journal                 ?

_publ_contact_author_name               ?
_publ_contact_author_address            
;
;
_publ_contact_author_email              ?
_publ_contact_author_fax                ?
_publ_contact_author_phone              ?

_publ_section_title                     
;
;
_publ_section_abstract                  
;
;
_publ_section_references                
;
;
_publ_section_comment                   
;
;

data_I
_chemical_name_systematic               ?
_chemical_name_common                   152-2
_chemical_formula_moiety                ?
_chemical_formula_sum                   'C20 H22 O2'
_chemical_formula_iupac                 ?
_chemical_formula_weight                294.38

_chemical_melting_point                 ?

_space_group_crystal_system             monoclinic
_space_group_name_H-M_alt               'P 1 21/n 1'
_space_group_name_Hall                  '-P 2yn'
loop_
    _space_group_symop_operation_xyz
    'x, y, z'
    '-x+1/2, y+1/2, -z+1/2'
    '-x, -y, -z'
    'x-1/2, -y-1/2, z-1/2'

_cell_length_a                          9.318(3)
_cell_length_b                          16.115(6)
_cell_length_c                          10.684(4)
_cell_angle_alpha                       90
_cell_angle_beta                        99.129(5)
_cell_angle_gamma                       90
_cell_volume                            1584.0(9)
_cell_formula_units_Z                   4
_cell_measurement_reflns_used           8899
_cell_measurement_theta_min             2.7422
_cell_measurement_theta_max             64.5839
_cell_measurement_temperature           100.(2)

_exptl_crystal_description              'Irregular prism'
_exptl_crystal_colour                   ?
_exptl_crystal_size_max                 0.440
_exptl_crystal_size_mid                 0.380
_exptl_crystal_size_min                 0.270
_exptl_crystal_density_diffrn           1.234
_exptl_crystal_density_meas             ?
_exptl_crystal_density_method           'not measured'
_exptl_crystal_F_000                    632

_exptl_absorpt_coefficient_mu           0.611
_exptl_absorpt_correction_type          multi-scan
_exptl_absorpt_process_details          'SADABS V2008/1 (Bruker AXS)'
_exptl_absorpt_correction_T_min         0.73
_exptl_absorpt_correction_T_max         0.85

_exptl_special_details                  
;
; 

_diffrn_ambient_temperature             100.(2)

_diffrn_source                          ?
_diffrn_source_type                     ?

_diffrn_radiation_type                  ?
_diffrn_radiation_wavelength            1.54178
_diffrn_radiation_monochromator         ?

_diffrn_measurement_device_type         ?
_diffrn_measurement_method              ?

_diffrn_detector_area_resol_mean        8.3333

_diffrn_reflns_number                   8974
_diffrn_reflns_av_R_equivalents         0.0287
_diffrn_reflns_av_sigmaI/netI           0.0298
_diffrn_reflns_theta_min                5.01
_diffrn_reflns_theta_max                64.72
_diffrn_reflns_theta_full               64.72
_diffrn_measured_fraction_theta_max     0.941
_diffrn_measured_fraction_theta_full    0.941
_diffrn_reflns_limit_h_min              -10
_diffrn_reflns_limit_h_max              10
_diffrn_reflns_limit_k_min              -18
_diffrn_reflns_limit_k_max              16
_diffrn_reflns_limit_l_min              -12
_diffrn_reflns_limit_l_max              11

_refine_special_details                 
;
Refinement of F^2^ against ALL reflections.  The weighted R-factor wR and
goodness of fit S are based on F^2^, conventional R-factors R are based
on F, with F set to zero for negative F^2^. The threshold expression of
F^2^ > 2sigma(F^2^) is used only for calculating R-factors(gt) etc. and is
not relevant to the choice of reflections for refinement.  R-factors based
on F^2^ are statistically about twice as large as those based on F, and R-
factors based on ALL data will be even larger.
;

_reflns_number_total                    2517
_reflns_number_gt                       2480
_reflns_threshold_expression            >2sigma(I)

_refine_ls_structure_factor_coef        Fsqd
_refine_ls_matrix_type                  full
_refine_ls_R_factor_all                 0.0367
_refine_ls_R_factor_gt                  0.0362
_refine_ls_wR_factor_gt                 0.0865
_refine_ls_wR_factor_ref                0.0868
_refine_ls_goodness_of_fit_ref          1.052
_refine_ls_restrained_S_all             1.052
_refine_ls_number_reflns                2517
_refine_ls_number_parameters            202
_refine_ls_number_restraints            0
_refine_ls_hydrogen_treatment           mixed
_refine_ls_weighting_scheme             calc
_refine_ls_weighting_details
    'calc w=1/[\s^2^(Fo^2^)+(0.0295P)^2^+0.7329P] where P=(Fo^2^+2Fc^2^)/3'

_atom_sites_solution_hydrogens          geom
_atom_sites_solution_primary            direct
_atom_sites_solution_secondary          difmap

_refine_ls_shift/su_max                 0.002
_refine_ls_shift/su_mean                0.000
_refine_diff_density_max                0.208
_refine_diff_density_min                -0.184
_refine_ls_extinction_method            SHELXL
_refine_ls_extinction_coef              0.0047(6)

loop_
    _atom_type_symbol
    _atom_type_description
    _atom_type_scat_dispersion_real
    _atom_type_scat_dispersion_imag
    _atom_type_scat_source
    C C 0.0181 0.0091 'International Tables Vol C Tables 4.2.6.8 and 6.1.1.4'
    H H 0.0000 0.0000 'International Tables Vol C Tables 4.2.6.8 and 6.1.1.4'
    O O 0.0492 0.0322 'International Tables Vol C Tables 4.2.6.8 and 6.1.1.4'

_computing_data_collection              
    'Bruker Instrument Service v2012.6.0.0'
_computing_cell_refinement              'SAINT V7.68A (Bruker AXS, 2009)'
_computing_data_reduction               'SAINT V7.68A (Bruker AXS, 2009)'
_computing_structure_solution           'SHELXS-97 (Sheldrick, 2008)'
_computing_structure_refinement         'SHELXL-97 (Sheldrick, 2008)'
_computing_molecular_graphics           ?
_computing_publication_material         ?

loop_
    _atom_site_type_symbol
    _atom_site_label
    _atom_site_fract_x
    _atom_site_fract_y
    _atom_site_fract_z
    _atom_site_U_iso_or_equiv
    _atom_site_adp_type
    _atom_site_calc_flag
    _atom_site_refinement_flags
    _atom_site_occupancy
    _atom_site_disorder_assembly
    _atom_site_disorder_group
    O O1 0.89870(10) 0.82607(6) -0.14402(8) 0.0277(3) Uani d . 1 . .
    O O2 1.13040(9) 0.62901(6) 0.21700(8) 0.0224(2) Uani d . 1 . .
    H H2 1.2011 0.6511 0.2637 0.034 Uiso calc R 1 . .
    C C1 1.18733(15) 0.95655(9) 0.21780(13) 0.0277(3) Uani d . 1 . .
    H H1A 1.1831 0.9625 0.3084 0.042 Uiso calc R 1 . .
    H H1B 1.1689 1.0104 0.1758 0.042 Uiso calc R 1 . .
    H H1C 1.2839 0.9366 0.2067 0.042 Uiso calc R 1 . .
    C C2 1.07240(14) 0.89448(8) 0.15938(12) 0.0239(3) Uani d . 1 . .
    H H2A 0.9745 0.917 0.168 0.029 Uiso calc R 1 . .
    C C3 1.09189(14) 0.81136(8) 0.22816(12) 0.0227(3) Uani d . 1 . .
    H H3A 1.0905 0.8204 0.3196 0.027 Uiso calc R 1 . .
    H H3B 1.188 0.788 0.2191 0.027 Uiso calc R 1 . .
    C C4 0.97316(14) 0.74865(8) 0.17707(12) 0.0217(3) Uani d . 1 . .
    H H4 0.8774 0.7712 0.1923 0.026 Uiso calc R 1 . .
    C C5 0.99785(13) 0.66334(8) 0.24513(12) 0.0207(3) Uani d . 1 . .
    C C6 0.87732(14) 0.60158(8) 0.19375(11) 0.0207(3) Uani d . 1 . .
    C C7 0.90767(14) 0.53065(8) 0.12918(12) 0.0234(3) Uani d . 1 . .
    H H7 1.0042 0.5204 0.115 0.028 Uiso calc R 1 . .
    C C8 0.79769(15) 0.47440(9) 0.08502(12) 0.0260(3) Uani d . 1 . .
    H H8 0.8193 0.4266 0.0394 0.031 Uiso calc R 1 . .
    C C9 0.65715(15) 0.48774(9) 0.10720(12) 0.0263(3) Uani d . 1 . .
    H H9 0.5828 0.4485 0.0791 0.032 Uiso calc R 1 . .
    C C10 0.97290(14) 0.81645(8) -0.03996(12) 0.0227(3) Uani d . 1 . .
    C C11 1.07826(15) 0.88172(9) 0.01810(12) 0.0253(3) Uani d . 1 . .
    H H11A 1.0557 0.9348 -0.0273 0.03 Uiso calc R 1 . .
    H H11B 1.178 0.8652 0.0076 0.03 Uiso calc R 1 . .
    C C12 0.96722(15) 0.73709(8) 0.03312(12) 0.0256(3) Uani d . 1 . .
    H H12A 1.0497 0.7016 0.0187 0.031 Uiso calc R 1 . .
    H H12B 0.8764 0.7073 -0.001 0.031 Uiso calc R 1 . .
    C C13 1.00420(14) 0.66987(8) 0.38979(12) 0.0220(3) Uani d . 1 . .
    C C14 0.93516(15) 0.73269(9) 0.44785(13) 0.0261(3) Uani d . 1 . .
    H H14 0.881 0.774 0.3973 0.031 Uiso calc R 1 . .
    C C15 0.94497(16) 0.73537(9) 0.57910(14) 0.0317(3) Uani d . 1 . .
    H H15 0.8988 0.7789 0.6175 0.038 Uiso calc R 1 . .
    C C16 1.02135(16) 0.67518(10) 0.65406(13) 0.0340(4) Uani d . 1 . .
    H H16 1.0283 0.6776 0.7437 0.041 Uiso calc R 1 . .
    C C17 1.08794(16) 0.61113(10) 0.59775(13) 0.0331(4) Uani d . 1 . .
    H H17 1.1395 0.5691 0.6486 0.04 Uiso calc R 1 . .
    C C18 1.07888(15) 0.60879(9) 0.46645(13) 0.0269(3) Uani d . 1 . .
    H H18 1.1244 0.5648 0.4284 0.032 Uiso calc R 1 . .
    C C19 0.73462(15) 0.61534(9) 0.21329(12) 0.0251(3) Uani d . 1 . .
    H H19 0.7119 0.6641 0.2562 0.03 Uiso calc R 1 . .
    C C20 0.62574(15) 0.55883(9) 0.17086(13) 0.0272(3) Uani d . 1 . .
    H H20 0.5293 0.5688 0.1854 0.033 Uiso calc R 1 . .

loop_
    _atom_site_aniso_label
    _atom_site_aniso_U_11
    _atom_site_aniso_U_22
    _atom_site_aniso_U_33
    _atom_site_aniso_U_12
    _atom_site_aniso_U_13
    _atom_site_aniso_U_23
    O1 0.0279(5) 0.0324(6) 0.0223(5) 0.0036(4) 0.0027(4) 0.0030(4)
    O2 0.0185(5) 0.0259(5) 0.0232(5) 0.0017(4) 0.0048(3) -0.0012(4)
    C1 0.0265(7) 0.0256(7) 0.0318(7) -0.0010(5) 0.0065(6) 0.0006(6)
    C2 0.0226(7) 0.0236(7) 0.0260(7) 0.0010(5) 0.0054(5) -0.0005(5)
    C3 0.0228(7) 0.0244(7) 0.0215(6) 0.0000(5) 0.0055(5) -0.0002(5)
    C4 0.0207(7) 0.0228(7) 0.0220(7) 0.0015(5) 0.0048(5) 0.0009(5)
    C5 0.0188(6) 0.0232(7) 0.0210(6) 0.0022(5) 0.0061(5) 0.0002(5)
    C6 0.0219(7) 0.0232(7) 0.0173(6) 0.0003(5) 0.0038(5) 0.0039(5)
    C7 0.0246(7) 0.0262(7) 0.0199(6) 0.0023(5) 0.0053(5) 0.0026(5)
    C8 0.0322(7) 0.0239(7) 0.0218(6) 0.0007(5) 0.0038(5) -0.0008(5)
    C9 0.0267(7) 0.0273(7) 0.0236(7) -0.0056(5) 0.0001(5) 0.0033(6)
    C10 0.0212(7) 0.0269(7) 0.0211(7) 0.0055(5) 0.0070(5) 0.0000(5)
    C11 0.0264(7) 0.0238(7) 0.0264(7) 0.0025(5) 0.0064(5) 0.0046(5)
    C12 0.0299(7) 0.0239(7) 0.0226(7) -0.0012(5) 0.0030(5) -0.0001(5)
    C13 0.0210(7) 0.0248(7) 0.0210(7) -0.0058(5) 0.0057(5) 0.0001(5)
    C14 0.0265(7) 0.0263(7) 0.0273(7) -0.0048(5) 0.0097(5) -0.0020(6)
    C15 0.0346(8) 0.0339(8) 0.0301(7) -0.0119(6) 0.0162(6) -0.0090(6)
    C16 0.0372(8) 0.0460(9) 0.0200(7) -0.0167(7) 0.0086(6) -0.0032(6)
    C17 0.0336(8) 0.0412(9) 0.0241(7) -0.0072(6) 0.0036(6) 0.0075(6)
    C18 0.0277(7) 0.0299(8) 0.0236(7) -0.0025(6) 0.0061(5) 0.0022(6)
    C19 0.0256(7) 0.0254(7) 0.0253(7) 0.0018(5) 0.0067(5) -0.0005(6)
    C20 0.0222(7) 0.0315(8) 0.0281(7) -0.0004(6) 0.0048(5) 0.0028(6)

_geom_special_details                   
;
All esds (except the esd in the dihedral angle between two l.s. planes)
are estimated using the full covariance matrix.  The cell esds are taken
into account individually in the estimation of esds in distances, angles
and torsion angles; correlations between esds in cell parameters are only
used when they are defined by crystal symmetry.  An approximate (isotropic)
treatment of cell esds is used for estimating esds involving l.s. planes.
;

loop_
    _geom_bond_atom_site_label_1
    _geom_bond_atom_site_label_2
    _geom_bond_site_symmetry_2
    _geom_bond_distance
    _geom_bond_publ_flag
    O1 C10 . 1.2224(17) ?
    O2 C5 . 1.4282(15) ?
    O2 H2 . 0.84 ?
    C1 C2 . 1.5248(19) ?
    C1 H1A . 0.98 ?
    C1 H1B . 0.98 ?
    C1 H1C . 0.98 ?
    C2 C3 . 1.5247(19) ?
    C2 C11 . 1.5330(19) ?
    C2 H2A . 1.0 ?
    C3 C4 . 1.5335(18) ?
    C3 H3A . 0.99 ?
    C3 H3B . 0.99 ?
    C4 C12 . 1.5415(19) ?
    C4 C5 . 1.5551(18) ?
    C4 H4 . 1.0 ?
    C5 C6 . 1.5356(18) ?
    C5 C13 . 1.5410(18) ?
    C6 C7 . 1.3872(19) ?
    C6 C19 . 1.3960(19) ?
    C7 C8 . 1.393(2) ?
    C7 H7 . 0.95 ?
    C8 C9 . 1.384(2) ?
    C8 H8 . 0.95 ?
    C9 C20 . 1.387(2) ?
    C9 H9 . 0.95 ?
    C10 C11 . 1.5038(19) ?
    C10 C12 . 1.5038(19) ?
    C11 H11A . 0.99 ?
    C11 H11B . 0.99 ?
    C12 H12A . 0.99 ?
    C12 H12B . 0.99 ?
    C13 C18 . 1.394(2) ?
    C13 C14 . 1.3966(19) ?
    C14 C15 . 1.391(2) ?
    C14 H14 . 0.95 ?
    C15 C16 . 1.381(2) ?
    C15 H15 . 0.95 ?
    C16 C17 . 1.390(2) ?
    C16 H16 . 0.95 ?
    C17 C18 . 1.392(2) ?
    C17 H17 . 0.95 ?
    C18 H18 . 0.95 ?
    C19 C20 . 1.385(2) ?
    C19 H19 . 0.95 ?
    C20 H20 . 0.95 ?

loop_
    _geom_angle_atom_site_label_1
    _geom_angle_atom_site_label_2
    _geom_angle_atom_site_label_3
    _geom_angle_site_symmetry_1
    _geom_angle_site_symmetry_3
    _geom_angle
    _geom_angle_publ_flag
    C5 O2 H2 . . 109.5 ?
    C2 C1 H1A . . 109.5 ?
    C2 C1 H1B . . 109.5 ?
    H1A C1 H1B . . 109.5 ?
    C2 C1 H1C . . 109.5 ?
    H1A C1 H1C . . 109.5 ?
    H1B C1 H1C . . 109.5 ?
    C3 C2 C1 . . 110.90(11) ?
    C3 C2 C11 . . 109.68(11) ?
    C1 C2 C11 . . 111.02(11) ?
    C3 C2 H2A . . 108.4 ?
    C1 C2 H2A . . 108.4 ?
    C11 C2 H2A . . 108.4 ?
    C2 C3 C4 . . 112.54(11) ?
    C2 C3 H3A . . 109.1 ?
    C4 C3 H3A . . 109.1 ?
    C2 C3 H3B . . 109.1 ?
    C4 C3 H3B . . 109.1 ?
    H3A C3 H3B . . 107.8 ?
    C3 C4 C12 . . 110.15(10) ?
    C3 C4 C5 . . 111.80(10) ?
    C12 C4 C5 . . 109.81(10) ?
    C3 C4 H4 . . 108.3 ?
    C12 C4 H4 . . 108.3 ?
    C5 C4 H4 . . 108.3 ?
    O2 C5 C6 . . 106.35(10) ?
    O2 C5 C13 . . 109.92(10) ?
    C6 C5 C13 . . 108.20(10) ?
    O2 C5 C4 . . 108.23(10) ?
    C6 C5 C4 . . 111.12(10) ?
    C13 C5 C4 . . 112.83(10) ?
    C7 C6 C19 . . 118.65(12) ?
    C7 C6 C5 . . 121.11(11) ?
    C19 C6 C5 . . 120.23(11) ?
    C6 C7 C8 . . 120.50(12) ?
    C6 C7 H7 . . 119.8 ?
    C8 C7 H7 . . 119.8 ?
    C9 C8 C7 . . 120.40(13) ?
    C9 C8 H8 . . 119.8 ?
    C7 C8 H8 . . 119.8 ?
    C8 C9 C20 . . 119.42(12) ?
    C8 C9 H9 . . 120.3 ?
    C20 C9 H9 . . 120.3 ?
    O1 C10 C11 . . 121.64(12) ?
    O1 C10 C12 . . 121.24(12) ?
    C11 C10 C12 . . 117.07(11) ?
    C10 C11 C2 . . 112.15(11) ?
    C10 C11 H11A . . 109.2 ?
    C2 C11 H11A . . 109.2 ?
    C10 C11 H11B . . 109.2 ?
    C2 C11 H11B . . 109.2 ?
    H11A C11 H11B . . 107.9 ?
    C10 C12 C4 . . 114.62(11) ?
    C10 C12 H12A . . 108.6 ?
    C4 C12 H12A . . 108.6 ?
    C10 C12 H12B . . 108.6 ?
    C4 C12 H12B . . 108.6 ?
    H12A C12 H12B . . 107.6 ?
    C18 C13 C14 . . 118.23(12) ?
    C18 C13 C5 . . 118.51(12) ?
    C14 C13 C5 . . 123.23(12) ?
    C15 C14 C13 . . 120.60(13) ?
    C15 C14 H14 . . 119.7 ?
    C13 C14 H14 . . 119.7 ?
    C16 C15 C14 . . 120.53(14) ?
    C16 C15 H15 . . 119.7 ?
    C14 C15 H15 . . 119.7 ?
    C15 C16 C17 . . 119.66(13) ?
    C15 C16 H16 . . 120.2 ?
    C17 C16 H16 . . 120.2 ?
    C16 C17 C18 . . 119.77(14) ?
    C16 C17 H17 . . 120.1 ?
    C18 C17 H17 . . 120.1 ?
    C17 C18 C13 . . 121.18(13) ?
    C17 C18 H18 . . 119.4 ?
    C13 C18 H18 . . 119.4 ?
    C20 C19 C6 . . 120.81(13) ?
    C20 C19 H19 . . 119.6 ?
    C6 C19 H19 . . 119.6 ?
    C19 C20 C9 . . 120.20(13) ?
    C19 C20 H20 . . 119.9 ?
    C9 C20 H20 . . 119.9 ?
